# Supplementary material
Source: PubMed Central journal article supplement (PMC2930268)
Supplement: NIHMS204835-supplement.pdf [file NIHMS204835-supplement.pdf]

**Supplementary Figure Legends:**

**S1. Polyclonal anti-CD39 specifically recognizes mCD39.** Splenocytes from CD39 KO mice crossed onto Foxp3GFP knockin background (left panel) or from wildtype Foxp3GFP knockin mice (middle panel) were stained with polyclonal anti-CD39. Only the wildtype cells give the typical GFP<sup>+</sup>CD39<sup>+</sup> (Treg) and GFP<sup>-</sup>CD39<sup>+</sup> (T<sub>mem</sub>) staining pattern. Isotype control staining is shown in the right panel.

**S2. Titration of anti-CD73 staining.** Spleen cells isolated from 6-8 wk old Foxp3GFP knockin mice were stained with polyclonal anti-CD39 (1:200), and different concentrations of anti-CD73 (BD Biosciences, San Diego, CA) at 1:200, 1:400 and 1:2,000. Histograms of anti-CD73 staining (solid line) of gated CD4<sup>+</sup> T cells were plotted against those of the isotype Ig control staining (shaded area).

**S3. Foxp3<sup>-</sup>CD39<sup>+</sup> cells do not suppress.** FACS-sorted GFP<sup>-</sup>CD39<sup>+</sup>, GFP<sup>+</sup>CD39<sup>+</sup> or GFP<sup>+</sup>CD39<sup>-</sup> testing suppressor cells were mixed with GFP<sup>-</sup>CD39<sup>-</sup> effector cells at 0.5:1 (gray bar) or 1:1 (black bar), and stimulated with soluble anti-CD3 (2 µg/mL) in the presence of mitomycin C treated CD4-depleted syngeneic splenocytes for 3 days. Cytokine levels were determined by ELISA.

**S4. Additional real-time PCR comparison between Foxp3<sup>-</sup>CD39<sup>-</sup> and Foxp3<sup>-</sup>CD39<sup>+</sup> cells.** FACS-sorted naïve (GFP<sup>-</sup>CD39<sup>-</sup>) and memory (GFP<sup>-</sup>CD39<sup>+</sup>) T cells were activated by anti-CD3 and anti-CD28. At 48 hrs, aliquots of activated naïve (GFP<sup>-</sup>CD39<sup>-</sup>, empty circle) and memory (GFP<sup>-</sup>CD39<sup>+</sup>, filled circle) T cells were analyzed by real-time PCR for cytokine messages. Data represent two independent experiments.

**S5. Foxp3<sup>-</sup>CD39<sup>+</sup> cells produce multiple cytokines upon activation.** FACS-sorted naïve (GFP<sup>-</sup>CD39<sup>-</sup>) and memory (GFP<sup>-</sup>CD39<sup>+</sup>) T cells were activated by anti-CD3 and anti-CD28. At 72 hrs, supernatants were collected and cytokine levels were determined by ELISA. Note that y axes for cytokines IFN- $\gamma$ , IL-4, IL-10 and IL-17A are in log scale. Data represent two independent experiments.

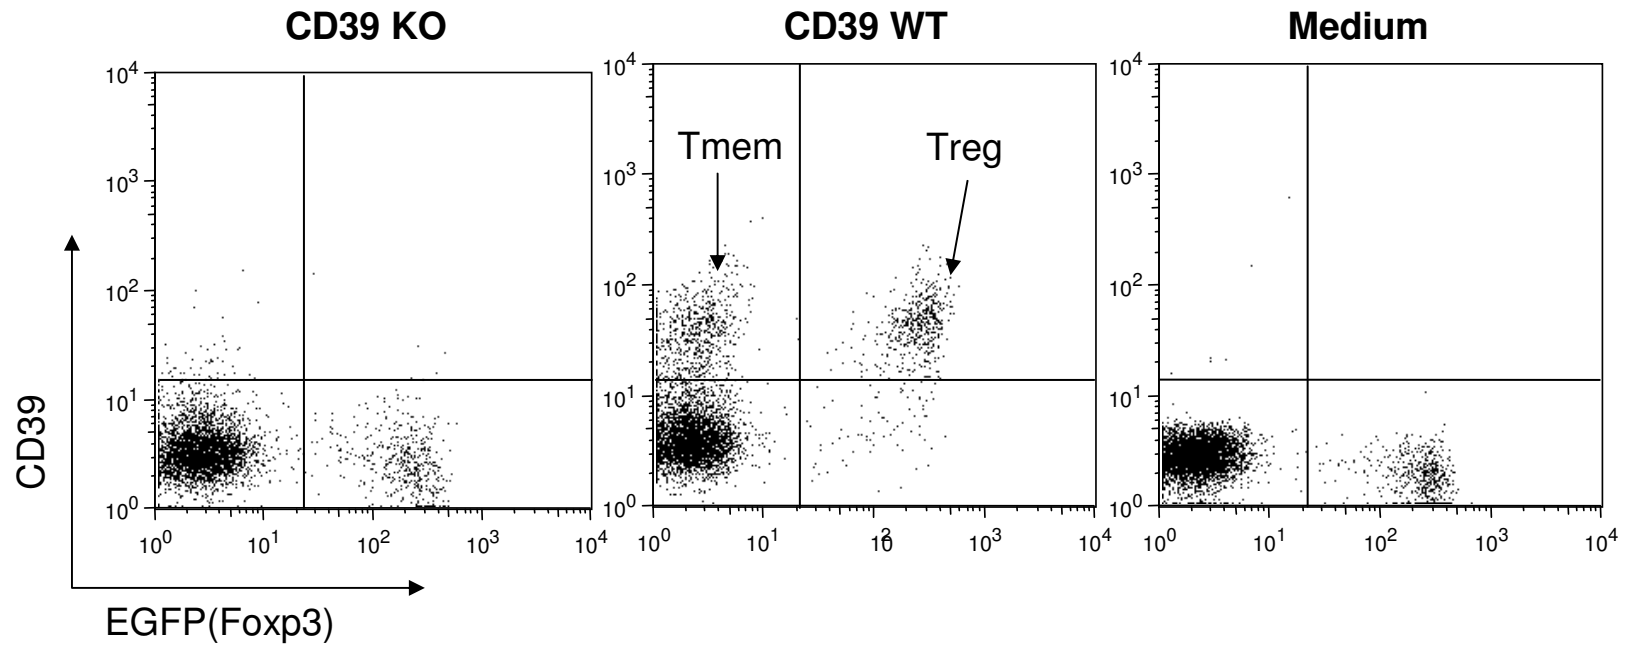

Supplementary Figure S1

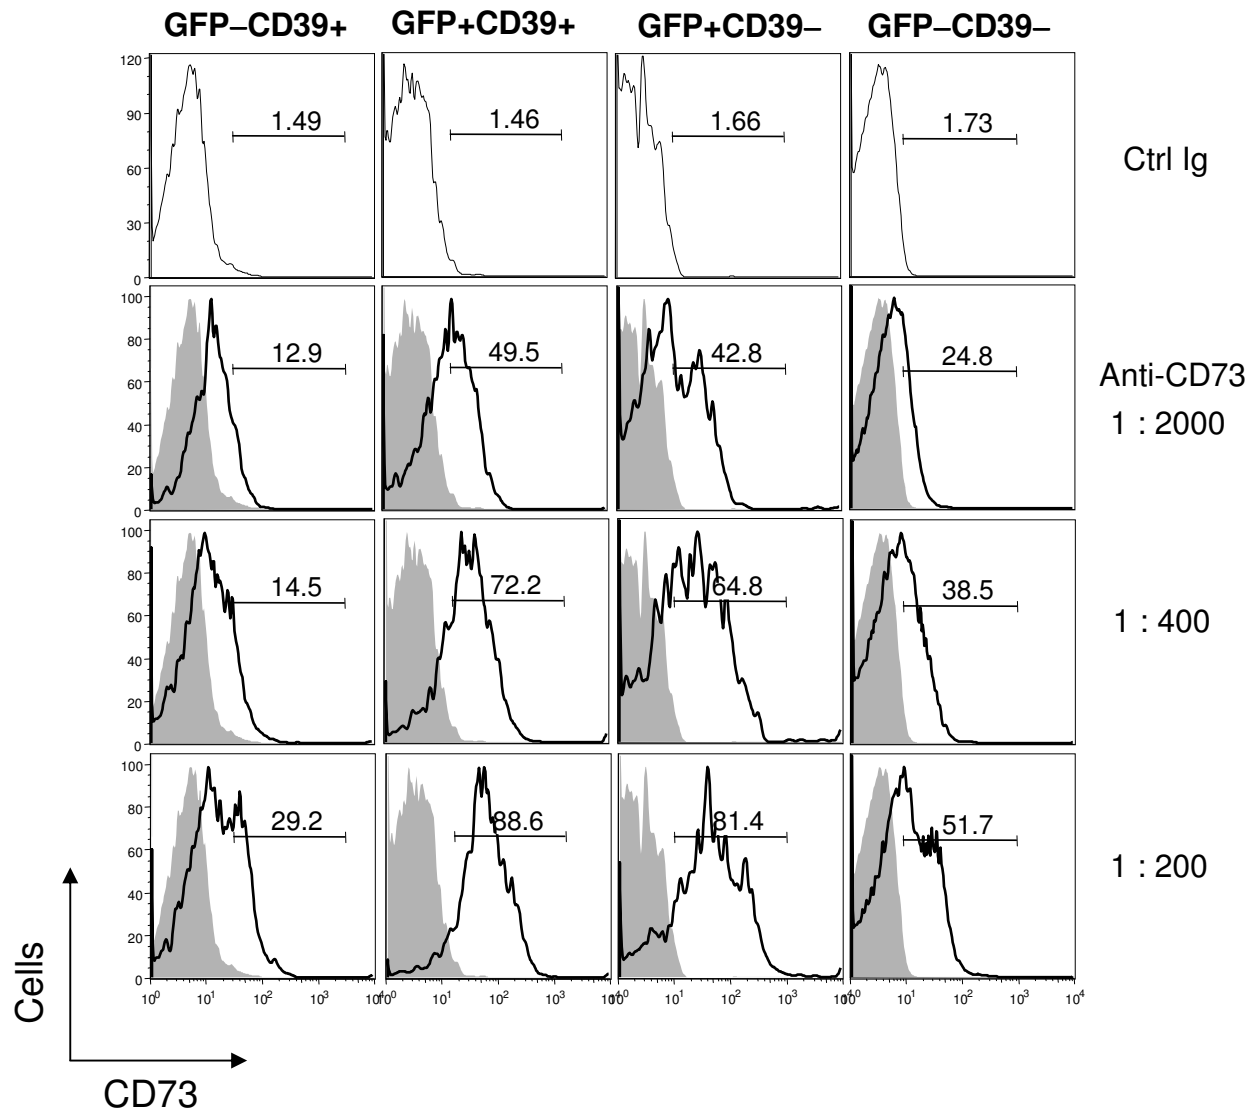

Supplementary Figure S2

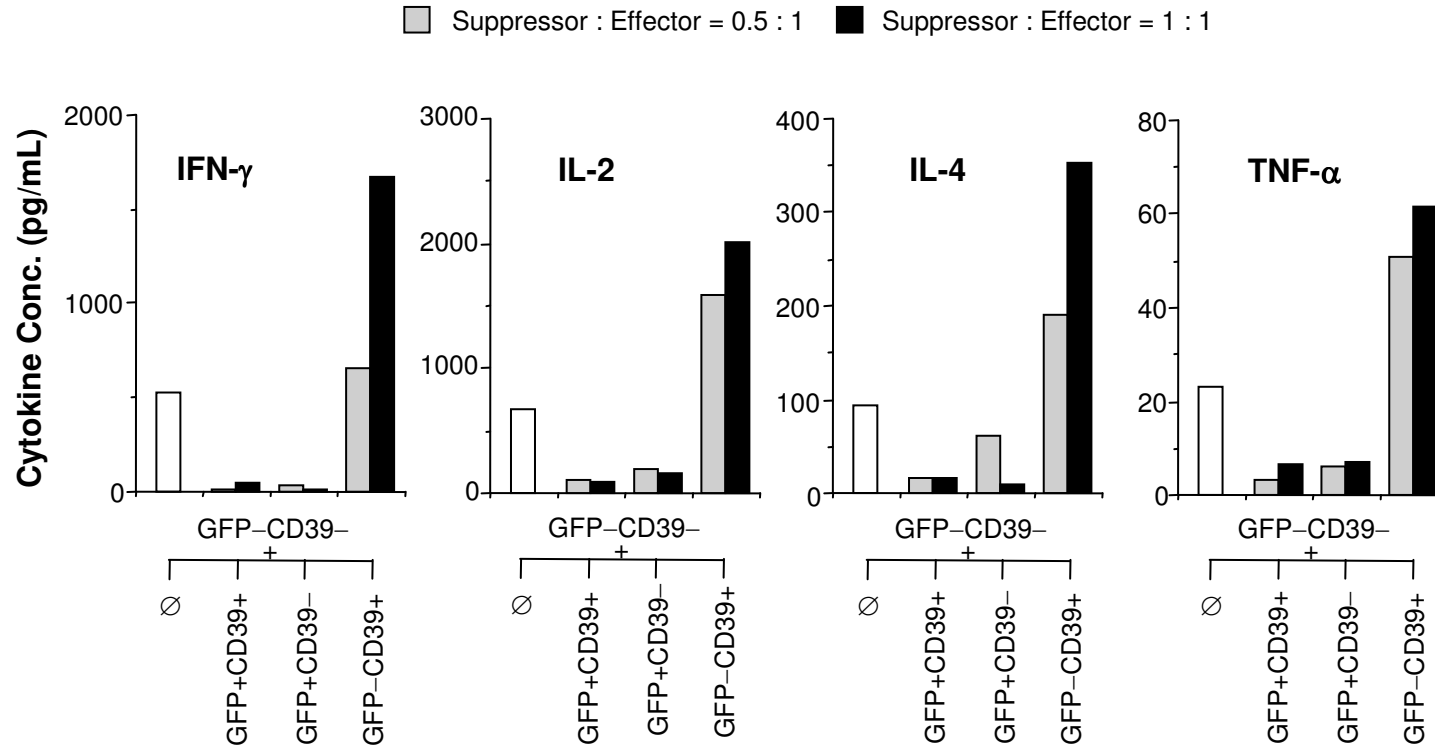

Supplementary Figure S3

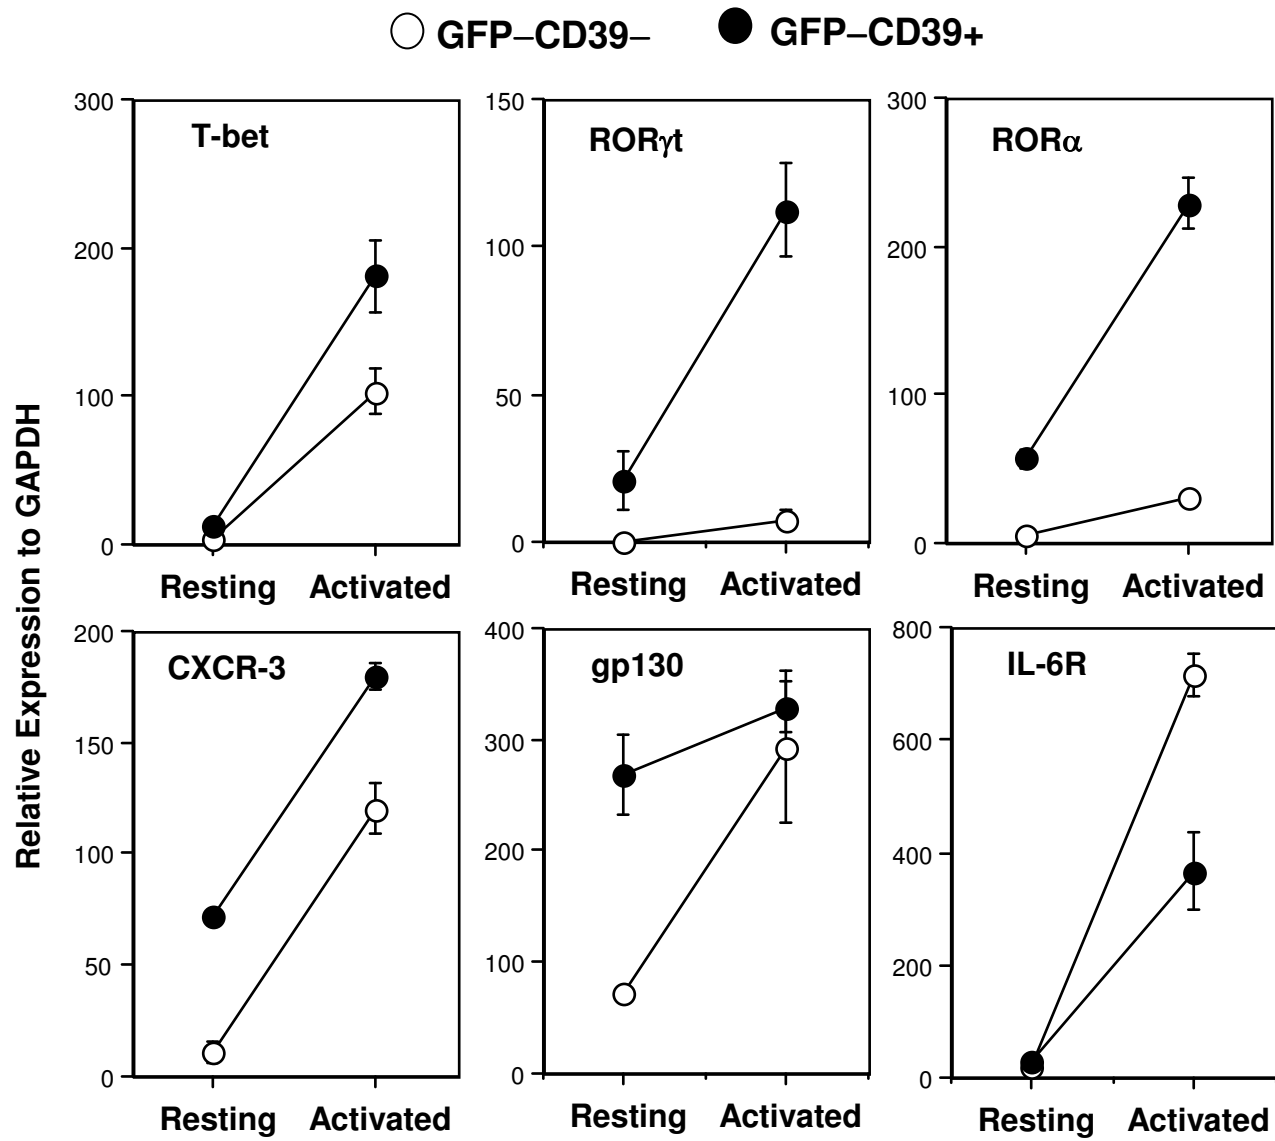

Supplementary Figure S4

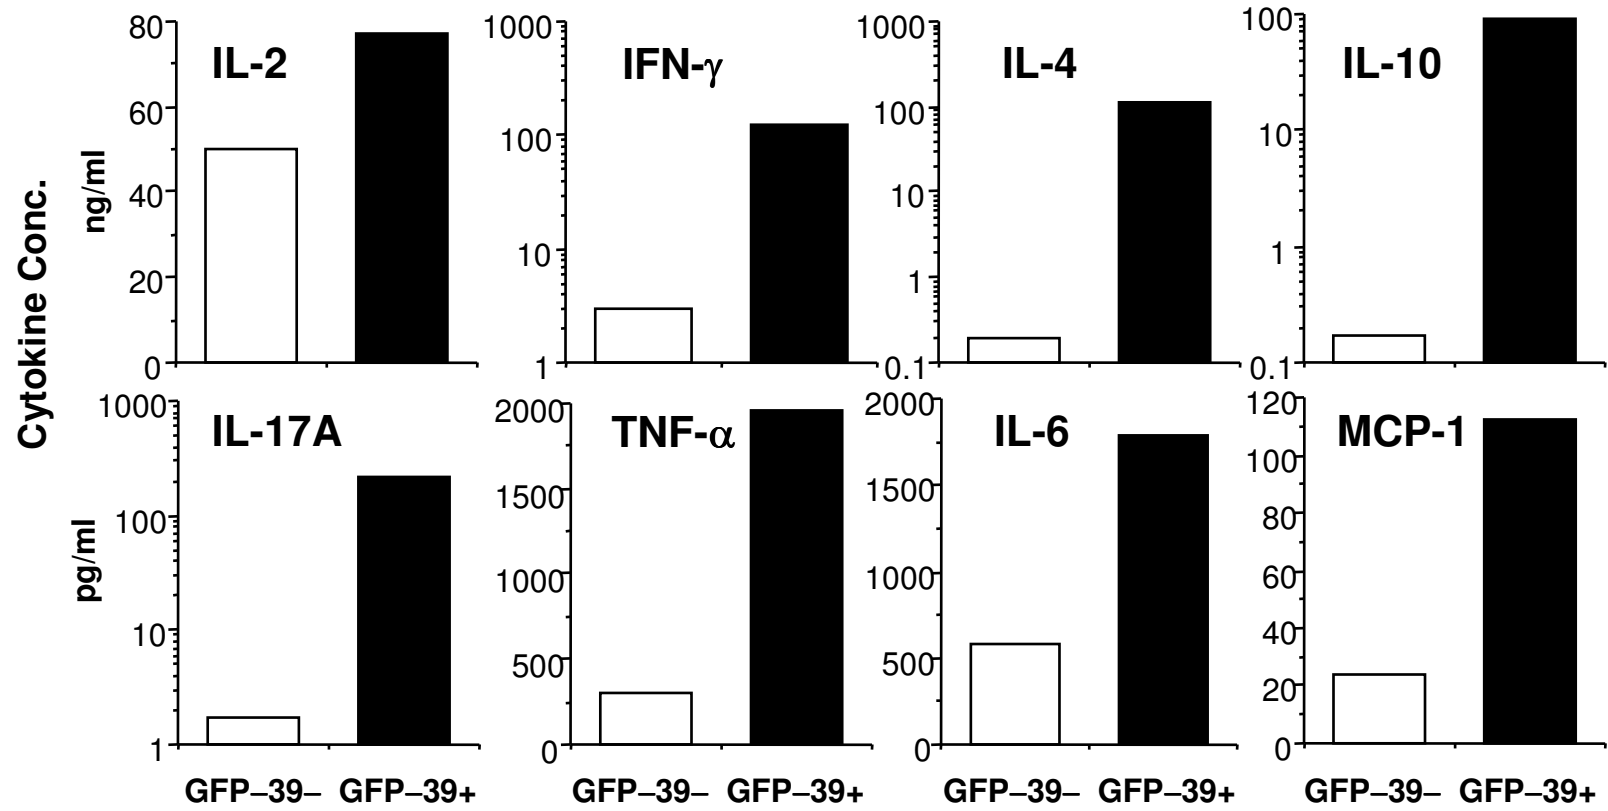

Supplementary Figure S5
